1 [A One Health approach to pastoral \(im\)mobility, health, and disease: a qualitative participatory study](#)  
2 [in Plateau State, Nigeria](#)

3  
4 [Authors](#)

5 Dorien Hanneke Braam; Disease Dynamics Unit, University of Cambridge, Cambridge, UK;  
6 [db746@cam.ac.uk](mailto:db746@cam.ac.uk)

7 Muhammad-Bashir Bolajoko, National Veterinary Research Institute, Vom, Plateau State, Nigeria;  
8 [mbbolajoko@gmail.com](mailto:mbbolajoko@gmail.com)

9 Charlotte Christiane Hammer (corresponding author); Disease Dynamics Unit, Department of  
10 Veterinary Medicine, University of Cambridge, Madingley Road, CB3 0ES, Cambridge, United  
11 Kingdom; [ch050@cam.ac.uk](mailto:ch050@cam.ac.uk)

12

13 [Abstract/ Summary](#)

14 Background: In Plateau State, pastoralism has historically been a cost effective and resilient economic  
15 system well-suited to the ecological context. However, changes in land use and conflict have  
16 increasingly changed patterns of mobility. Pastoralist movement is now often associated with zoonotic  
17 disease transmission, environmental degradation and conflict, increasingly resulting in forced  
18 sedentarisation. Rather than a direct outcome of population movement however, animal, human and  
19 zoonotic disease drivers are complex and influenced by a range of socio-economic and environmental  
20 factors. The interlinkages of (im)mobility and health requires better understanding of underlying  
21 vulnerabilities to disease, which we aim to address in this study.

22 Methods: Using a multisite case study methodology we investigated pastoralists' animal and human  
23 health concerns and priorities in Plateau State, Nigeria. We deployed participatory tools, including  
24 open-ended Focus Group Discussions, transect walks, mapping exercises, calendars and matrices.  
25 Data were analysed using a One Health conceptual framework.

26 Results: We interviewed 105 participants, from transhumance, migratory and sedentary households,  
27 dependent on livestock and small-scale crops. While transhumance was often preferred, participants  
28 had become sedentary as a result of insecurity, loss in livestock, and household characteristics.  
29 Humans and animals suffered from several endemic diseases, including zoonoses, however veterinary  
30 and human health services are only available in larger towns, and people mostly rely on community  
31 (animal) health workers and self-medication. Both transhumance and sedentary livestock keepers face  
32 challenges around forage grazing, regularly blocked by landowners, sometimes escalating into conflict.

33 Conclusions: While conflict and changes in land use affected animal and human disease patterns,  
34 underlying political, social and economic risk factors were important determinants of health. There is  
35 a need for more inclusive, transdisciplinary, multilevel approaches to address animal and human  
36 disease, based on better contextualization of the challenges, through the participation of affected  
37 communities.

38 [Keywords](#)

39 Migration, Nigeria, zoonoses, social determinants of health, conflict

## 40 Impacts

- 41 • This study uses participatory approaches to investigate the under researched area of mobility  
42 and zoonotic disease dynamics.
- 43 • We found that animal and human mobility may mitigate or exacerbate zoonotic disease risk,  
44 impacting conflict, in turn leading to forced migration.
- 45 • Conflict and crime related security challenges need to be addressed simultaneously with  
46 mitigating structural inequality, through increasing pastoral social and economic capital,  
47 increase access to grazing routes and water, secure land tenure arrangements, and the  
48 provision of (veterinary) public health to reduce zoonotic disease risks in the region.

## 49 Introduction

50 Nigeria is Africa's most populous country, with a population of over 200 million people (FEWSNET,  
51 2018). Agriculture contributes about 21.2 percent to Gross Domestic Product (GDP), with livestock  
52 contributing 9 percent (Majekodunmi, 2022), and 36.5 percent to employment (Ihekweazu et al.,  
53 2021). The national livestock herd is estimated at 18.4 million cattle, 43.4 million sheep, 76 million  
54 goats and 180 million poultry (FAO, 2019). Pastoralism, a subsistence strategy based on the herding of  
55 animals, practiced by the majority of ruminant farmers (Majekodunmi, 2022) accounts for 82 percent  
56 of cattle. Herd sizes are extremely variable, with most herds in the ranges of 10 to 20 cattle and 50 to  
57 100 cattle (Majekodunmi, Fajinmi, Dongkum, Shaw, & Welburn, 2014). This transhumant production  
58 system is based on the seasonal and cyclical migration of livestock, with non-herding members of the  
59 community engaging in crop production (IOM, ECOWAS, & ICMPD, 2017). There is a lack of data on  
60 pastoralism in sub-humid zones (Majekodunmi et al., 2014), as well as the interlinkages of migration  
61 and zoonotic disease dynamics. While rabies, avian influenza, Ebola Virus Disease (EVD), swine  
62 influenza and anthrax are considered zoonoses of most concern (Ihekweazu et al, 2021), there is little  
63 data available on the actual zoonotic disease burden in the region.

64

65 Pastoralists are often held responsible for overgrazing and disease spread (Sani Ibrahim, Ozdeser,  
66 Cavusoglu, & Abdullahi Shagali, 2021), even though pastoralism may actually contribute to healthier  
67 environments, as continuous movement enables the recovery of natural resources (Manzano et al.,  
68 2021). The association with disease transmission, environmental degradation and conflict,  
69 increasingly results in forced sedentarisation of pastoral communities (Okello et al, 2014). However,  
70 this may increase disease burden, as seasonal vectors such as mosquitoes and tsetse flies can no  
71 longer be avoided (Leach et al, 2017). Rather than a direct outcome of population movement  
72 therefore, zoonotic disease drivers are complex and influenced by a range of socio-economic and  
73 environmental factors (Braam et al, 2021a). The interlinkages of (im)mobility and zoonotic health  
74 requires better understanding of underlying vulnerabilities to disease, which we aim to address in this  
75 study.

76

## 77 Materials and Methods

78 We used a participatory multisite case study methodology to investigate pastoralists' zoonotic health  
79 concerns and priorities in Plateau State, Nigeria. Fieldwork was conducted in five communities during  
80 February 2022. We employed participatory methods to enhance participants' control, implemented by  
81 researchers from different disciplines, including public health, veterinary medicine and the social  
82 sciences, to ensure interdisciplinarity and strengthen research design and analysis. Open-ended Focus  
83 Group Discussions (FGDs) to allow for refocusing of the interview based on participants' priorities.  
84 Findings were analysed and interpreted using a One Health conceptual framework, which allows for a

85 comprehensive consideration of human, animal and environmental health, taking into account  
86 complex historical, political, and socio-economic dynamics.

87

#### 88 Study area and participants

89 Historically, the central plain of Plateau State was largely uninhabited, open savannah woodland,  
90 which offered grazing areas and the absence of tsetse and mosquitoes to the hill tribes resettled there  
91 by the British colonizers (Majekodunmi et al., 2014). Fulani established themselves across the Plateau  
92 and on the lowland plains, for its fertile environment and relatively low levels of disease, adopting a  
93 largely agro-pastoralist lifestyle around one hundred years ago (Higazi, 2016). Fulani are the primary  
94 pastoral population in Nigeria, a diverse group numbering around 15.3 million people. In addition to  
95 livestock keeping, most Fulani grow crops such as maize, vegetables and millet on small pieces of land  
96 up to 10 acres, a way to spread risk in response to increased competition over natural resources  
97 (Majekodunmi, Dongkum, Langs, Shaw, & Welburn, 2017; Majekodunmi et al., 2014). The Fulani are  
98 still considered as ‘settlers’, while the ‘indigenes’ Christian tribes retain an advantage in terms of  
99 social, political and economic benefits (Majekodunmi et al., 2014). This has caused tensions which  
100 spilled over into violent conflict in 2001 and have flared up regularly since. In rural areas, conflicts  
101 focus primarily on livestock grazing and crop encroachment.

102 The Fulani communities interviewed for this study include transhumance, migratory and sedentary  
103 households. Community leaders and 10-12 households were selected using a purposive sampling  
104 method based on mobility and livelihood, to partake in Focus Group Discussions (FGDs). We  
105 interviewed 105 participants, 53 women and 52 men, of whom 29 practices transhumance while 23  
106 remained sedentary. All participant households owned mixed herds primarily for subsistence, and  
107 supported their livelihoods through crop farming, and labour migration, while in one community  
108 (MA4) some participants earned a livelihood by providing transportation. [sentence deleted for  
109 anonymization].

#### 110 Data collection and analysis

111 Fieldwork was conducted in Fulfulde language by six researchers from the Hausa (5) and Fulani (1)  
112 ethnic groups, which included experienced veterinary staff, community animal health workers  
113 (CAHW) and an existing network of pastoralist community leaders. The semi-structured FGDs  
114 included questions on demographic and socio-economic community and household characteristics,  
115 individual and community mobility and migration experiences, human and animal health, and health-  
116 seeking practices. The interview guides are available as supplementary material to this manuscript.  
117 Interviews were recorded with the participants’ consent, and transcripts and fieldwork notes  
118 translated into English for analysis. Quotes and findings presented in the Results section were  
119 anonymised through assigning interview codes which represent the gender of those interviewed  
120 during the FGD, and the geographical location where the FGD was held. Observations within and  
121 around the household and community were recorded using field notes and photos and analysed to  
122 contextualize and triangulate interview responses. Data analysis was conducted manually in English,  
123 using a thematical analysis approach (Attride-Stirling, 2001). Study findings were interpreted using  
124 concepts from the One Health framework approach to analyse the interlinkages of human, animal and  
125 environmental health and to position the findings within current trends and developments in Plateau  
126 State and Nigeria.

## 127 Results

### 128 Communities and their environment

129 Besides keeping ruminants and poultry for milk, manure and meat, all participants planted crops for  
130 food and income. Most crop produce was destined for home consumption, while leftovers were used  
131 for animal feed or sold for extra income or school fees (WM1). Participants' primary concern was the  
132 reduction in access to land for subsistence crop farming and grazing (WM1; WK3). While livestock  
133 could feed on crop leftovers during dry season (MK3), in rainy season grazing areas were blocked by  
134 farmers cultivating their land (MK3; ML5). Elsewhere, government farming occupied former pasture  
135 (ML5). Another concern was the limited water supply, in particular during the dry season. Water was  
136 obtained from different sources: central boreholes (MM1; WS2), private wells (MM1), constructed or  
137 natural dams (WM1; WS2), and/ or water trucking (WA4). None of these sources guaranteed  
138 sufficient water supply, however. Over the years, dry season farming has taken over communal water  
139 sources (MM1). Some participants had made (paid) arrangements with farmers (MM1), whereby their  
140 animals were allowed to drink water from irrigation canals or streams on farmland (WM1; ML5).  
141 Other communities had invested in generators, pumping machines and water basins, however  
142 strained resources limited the water supply to specific hours, with people and herds taking turns  
143 (WM1). Elsewhere, the closest water source was as far away as two hours travel (WK3). During rainy  
144 season in June and July (WM1) rivers filled gullies with water for the animals, posing an erosion risk  
145 (MS2). Observations confirmed that erosion was present in four out of five communities, causing  
146 occasional rockfall during rainy season (WA4). Other environmental degradation was caused by  
147 deforestation (MA4), with 64 percent of the land at risk (FAO, 2019).

148 Even though the sale of animals was an important part of participants' livelihood, there were few  
149 animal markets in the region, with participants travelling up to two hours (WA4). Travelling to and  
150 from the markets was not without its risks from thieves and other insecurity issues (MM1). Pretend  
151 'security agents' at illegal checkpoints sometimes required bribes (MM1), while property theft  
152 included stealing motorcycles and small animals (MA4; ML5). More significant theft occurred at night  
153 when men returned from the markets with their profits (WA4; ML5). Road accidents were common,  
154 particularly during rainy season (MK3; ML5). Only in one community none of the participants had  
155 faced security challenges on their way to the market (WL5).

### 156 (Im)mobility

157 Communities consisted of a combination of transhumant and settled/ sedentary households.  
158 Transhumance - moving livestock between grazing grounds in a seasonal cycle - was conducted by  
159 men and considered necessary to find good quality pastures for the animals (MM1; MS2), and/ or  
160 water sources (MK3). Some herd owners hired boys from Langtang North and South to help with  
161 grazing, paid in-kind after the season (WS2; WA4). Transhumance had become increasingly  
162 challenging however, with grazing routes and seasons changing as a result of insecurity related to  
163 conflict and crime (WM1). While generally migration for grazing occurred during the dry season,  
164 starting in December/ January and returning between April - June, with varied timing depending on  
165 the origin and destination locations, one key informant mentioned that cattle left for grazing in  
166 November and returned in August (WM1). Some participants had experienced cattle rustling (MS2;  
167 MA4), while others lost sheep and goats to theft (MK3), with one community losing some just the day  
168 before the interview (WK3). Sometimes children and livestock were attacked during grazing (WS2).  
169 During the worst farmer - herder clashes, some children were even killed (WM1), although  
170 participants noted that in some communities, relationships improved in the past few years (MM1;  
171 WS4).

172 Cattle migration routes were increasingly encroached by crop farmers (WS2) or urbanization (ML5;  
 173 MA4). Crop farming encroachment was a particular risk during the rainy season, when farmers  
 174 planted their crops near or on the migratory routes (WL5), and respondents were careful not to enter  
 175 farmlands to prevent conflict (MK3). Some had decided to graze their animals along the sides of the  
 176 road to avoid clashes (WL5), while moving at night to minimize the risk of road traffic accidents  
 177 (MM1). Fishing and irrigation farming had taken over migratory watering points (ML5).

178 As a result of the challenges encountered during migration, including conflicts (MM1), lacking safe  
 179 cattle migration routes (WM1) and blockades, some participants had stopped transhumance  
 180 altogether. Sedentary participants generally owned fewer animals (MS2; MA4) and faced challenges in  
 181 feeding these (WS2; WK3). One participant explained how ‘during rainy season there is abundant  
 182 water, but nowhere to forage, while during the dry season there is no water, but abundant feed’  
 183 (WA4). Participants mentioned that for sedentary households, animal rearing is easier in the dry  
 184 season (WK3), when farmers may allow livestock to feed on crop harvest leftovers (ML5) in return for  
 185 manure (WS2), or for a payment of up to thirty thousand naira (US\$40.4)] (WA4). However, the  
 186 majority of farmers prevented animal grazing by burning the stalks on their fields immediately after  
 187 harvesting.

188

189 **Health and disease**

190 Most participants considered transhumance healthier for the animals (MM1; MA4), however others  
 191 noted that even during migration there was not always sufficient water, and diseases in grazing areas  
 192 affected humans and animals (WM1). Sick animals were kept at home, rather than continuing  
 193 migration (WK3). Participants were familiar with a range of animal diseases, often known by their  
 194 local names and/ or symptoms, with the most common diseases named: *huhu* (contagious bovine  
 195 pleuropneumonia (CBPP), *hanta* (fasciolosis), *boru* (Foot and Mouth Disease (FMD), *saifa* (Anthrax),  
 196 and *samore* (trypanosomiasis) in cattle; *mura* (Peste des Petits Ruminants (PPR), *dingishi* (foot rot),  
 197 ecto- and endoparasites in sheep and goats; and Newcastle Disease (NCD) in poultry, reflecting  
 198 findings from the literature (Ndahi et al, 2012). Table 1 gives an overview of the occurrence of reporting  
 199 of the most reported diseases across the fieldwork communities. Besides disease, animals and humans  
 200 were also at risk of wild animals, including *dilah* (fox, *Vulpes vulpes*), and *tunku* (wildcat, *Felis*  
 201 *silvestris*) (MS2) and hyenas (MK3), while scorpion- and snake bites occurred mainly during the rainy  
 202 season (WL5)/ March to June (WK3). In response to wild animals and other threats, all participants  
 203 kept dogs to guard their property. Most participants were familiar with the risk of *haukan kere*  
 204 (rabies) from dogs (MA4; ML5), however not all dogs were vaccinated, instead they were euthanized  
 205 when sick (WK3; WL5). Inside the house, participants kept cats to control rodents (MM1). Cats were  
 206 allowed to sleep on the bed (WM1) and were considered healthy: ‘cats don’t fall sick’ (WM1; WS2),  
 207 although in one community people understood from the veterinarian that cats may transmit  
 208 respiratory diseases (WA4; MA4).

209

210 *Table 1: most reported livestock diseases per community*

| Livestock disease reported | CBPP | Fasciolosis | FMD | Anthrax | Trypanosomiasis | PPR | Foot rot | Parasites | NCD |
|----------------------------|------|-------------|-----|---------|-----------------|-----|----------|-----------|-----|
| MM1                        | X    | X           | X   |         |                 | X   | X        |           |     |
| WM1                        | X    | X           | X   | X       |                 |     |          | X         |     |
| WS2                        | X    | X           | X   |         | X               | X   |          |           | X   |

|     |   |   |   |   |   |   |   |   |   |
|-----|---|---|---|---|---|---|---|---|---|
| MS2 | X | X | X |   | X | X | X |   | X |
| WK3 | X | X | X | X |   | X | X |   | X |
| MK3 | X | X | X | X | X | X | X | X | X |
| WA4 | X | X | X |   | X | X |   | X | X |
| MA4 | X | X | X |   | X | X | X | X | X |
| ML5 | X | X | X | X | X | X | X | X |   |

211

212

213 If ruminants fell ill, traditional treatments were used, while some participants called a veterinary  
 214 officer, although qualified staff and equipment were not always available (MM1). CAHW sometimes  
 215 visited the villages to treat and vaccinate animals on demand (MS2; WK3; MK3), while veterinary  
 216 advice was also obtained at veterinary clinics and dispensaries in larger towns and cities (MA4), up to  
 217 3.5 hours away (WA4). Drugs were often self-administered (MK3; ML5), and the use of long-acting  
 218 antibiotics was common (MK3). In the past, quacks treated some animals with fake drugs, ‘costing  
 219 their husbands over 300 thousand naira’ (US\$404) (WS2).

220

## 221 Discussion

### 222 Structural inequalities

223 We found that transhumance mobility decisions depended on people's cattle herd size, considerations  
 224 around personal safety and security, household circumstances and past experiences. Conflict and  
 225 related insecurity influence migration patterns (Sani Ibrahim et al., 2021), however rather than a  
 226 driver of displacement, we find that insecurity is a reason to become sedentary. The loss of livestock  
 227 and the need for income diversification are important household determinants of migration dynamics  
 228 (Sani Ibrahim et al., 2021). Those pastoralists fearing the loss of their livelihoods consider  
 229 sedentarisation or migration, with direct implications to global health and security, related to the  
 230 competition for land and natural resources between farmers and pastoralists (Sani Ibrahim et al.,  
 231 2021). Sedentarisation also increases risks of erosion, through the constant use of water points and  
 232 gullies, and overgrazing, as well as infectious disease amid increased population densities. As a result  
 233 of climate change and environmental degradation, migration is likely to increase (Olaniyan & Okeke-  
 234 Uzodike, 2015), as the pastoralist livelihood is challenged (SIPRI, 2022).

235

236 Attitudes to pastoralism in Nigeria are mixed. To those in favour, transhumant pastoralism is seen as  
 237 a highly productive and resilient economic system, and an effective and appropriate way to use  
 238 grazing resources (Ducrottoy et al., 2018), well adapted to the ecological context of West Africa (IOM et  
 239 al., 2017). By opponents of transhumance, pastoral livestock production is considered increasingly  
 240 unsustainable as a primary source of livelihood due to the changing socio-economic context, climatic  
 241 conditions, and rapid population growth (Sani Ibrahim et al., 2021). In response to the growing  
 242 population and limitations to available land, the government introduced a 10-year National Livestock  
 243 Transformation Plan (NLTP) in 2019, introducing livestock identification, hygiene and welfare  
 244 compliant slaughter measures, linking initiatives for rehabilitation of existing grazing reserves,  
 245 pasture management and dairy collection centres, with the ultimate aim to limit pastoral mobility  
 246 (Majekodunmi, 2022). This renewed proposal for ranching to stop pastoralist transhumance and  
 247 increase intensification, ignores the political and economic factors which caused previous attempts at  
 248 implementing grazing reserve systems to fail (UNOWAS, 2018), creating distrust and increased  
 249 opposition from pastoralists (ICC, 2021).

250

251 Pathways to disease

252 Our results indicate that increased sedentarisation and marginalisation of pastoralists affect  
253 livelihoods, but also animal, human and environmental health and disease dynamics. While most  
254 transhumance households migrate for forage, others migrate for (animal) health purposes, although  
255 some reported that animal health and production levels are not necessarily better in those who move.  
256 Where grazing is optimal, nutrition may improve animals' health status, however incursion into new  
257 environments and population density leads to increased vector contact and disease transmission  
258 (Majekodunmi, 2022). Meanwhile, when moving to urban centres, pastoralists will lose livestock and  
259 nutrition, reducing their exposure to zoonoses, as they no longer live with their animals. These  
260 complex dynamics are reflected in the literature, highlighting a gap in knowledge as to how (changes  
261 in) mobility affect animal and human health (Braam et al, 2021b).

262 Both transhumance and sedentary livestock keepers reported grazing challenges, which is regularly  
263 blocked by landowners' farming practices. This creates pathways to disease, for instance, moving away  
264 from the tsetse flies during the rainy season might no longer be possible (Ducrottoy et al., 2018;  
265 Okello, Majekodunmi, Malala, Welburn, & Smith, 2014). A number of diseases are endemic and  
266 present year-round or seasonal in both humans and animals. Participants were aware of a range of  
267 infectious and zoonotic disease risks, including drinking from standing water and dog bites.  
268 Responses to disease vary however, based on the availability of veterinary and health services. These  
269 are often only available in larger towns, and people mostly rely on CAHWs and self-medication.  
270 Migration changes the distance to markets and services, already suboptimal in origin villages. A 2005  
271 survey of nomadic Fulani found that 99 percent of children had not received routine childhood  
272 immunisations due to their mobility and remote locations (Wild et al., 2020).

273 Faced with the high burden of infectious diseases, including zoonoses in pastoral areas, in December  
274 2019 the government launched a national One Health strategic plan to integrate human, animal and  
275 environmental health management. A high-level disease prioritization workshop defined rabies, avian  
276 influenza, EVD, swine influenza and anthrax as national priority zoonoses, primarily focusing on  
277 diseases impacting a country's trade and economy, rather than the concerns of smallholders and poor  
278 rural livestock keepers (Ihekweazu et al., 2021). Our participants considered neglected endemic  
279 diseases as most impactful instead, highlighting the importance for inclusion of all stakeholders in  
280 these exercises.

281

282 Safety first

283 In our study, structural inequalities leading to zoonotic disease vulnerabilities seemed primarily  
284 related to security challenges. Drivers of migration may cause conflict, in turn causing further  
285 displacement and insecurity, negatively affecting ecosystems and nutrition, and through this human  
286 and animal immune status. Conflict and insecurity in Nigeria have caused one of the world's most  
287 complex displacement crises, with over 2.7 million people living displaced due to overlapping conflict,  
288 disasters, and violence linked to crime (IDMC, 2021). It is essential to acknowledge and better  
289 understand the security challenges when addressing zoonotic disease risks in this context. Although  
290 the root causes of the violence and insecurity are complex, demanding their own field of study, we  
291 highlight some of the grievances of the participants in the below section to support local,  
292 contextualised solutions.

293

294 Conflicts between pastoralists and farmers are attributed to increased competition over rural  
295 resources and land, mixed with local politics along ethno-religious affiliations (Majekodunmi, 2022).  
296 Competition has led to the destruction of crops, encroachment of grazing routes and livestock theft,

297 which has increased distrust between crop farmers and pastoralists (Sani Ibrahim et al., 2021). While  
298 the expansion of farming ranges hampers access to transhumance routes, which are essential to  
299 pastoralists for seasonal grazing, they often get blamed for the destruction of agriculture and crops  
300 (Lenshie, Okengwu, Ogbonna, & Ezeibe, 2021; SIPRI, 2022; UNOWAS, 2018). Climate change further  
301 exacerbates the risk of farmer–herder conflicts, in areas where governance systems create inequalities  
302 (SIPRI, 2022), or where state authority is absent (Lenshie et al., 2021).

303

304 Government bans on open grazing negatively affects pastoralist communities. The symbiotic tradition  
305 whereby livestock benefited from crop residues in return for manure has collapsed over time, and the  
306 fragmentation of land and changes in property rights have further strained relationships between  
307 farmers and pastoralists (Sani Ibrahim et al., 2021). Participant interviews identified varied levels of  
308 resentment 'land owners may replant some other forms of crop in the same farmland [as we plant our  
309 crops] rendering [our] own crop useless' (WS2). While many farmers therefore no longer require the  
310 traditional services of the Fulani pastoralists, the latter are still dependent on farmers for access to  
311 natural resources (Ducrotoy et al., 2018). Our study shows that relations between pastoralists and  
312 land-owning farmers are complex, implying that some decisions may be personal rather than  
313 practical, which can be explored in finding solutions.

#### 314 Conclusion

315 We found that mobility may mitigate or exacerbate zoonotic disease risk, with the latter in turn  
316 leading to forced migration. Security issues such as conflict, rustling and crimes need to be addressed  
317 simultaneously with mitigating structural inequalities to reduce disease transmission risk. This  
318 includes increasing pastoral social and economic capital to reduce inequality and competition, better  
319 access to grazing routes and boreholes, securing land tenure arrangements to reduce the pressure on  
320 rangeland resources and minimize conflict, and enhance (veterinary) public health to reduce zoonotic  
321 disease risks for the communities and wider population. Importantly, framing of zoonotic disease risk  
322 should not blame any specific population group or individuals, to allow for a more inclusive approach  
323 to mobility and health.

#### 324 Limitations

325 The qualitative research methodology does not aim to provide generalizable research findings,  
326 acknowledging that people and phenomena depend on their context and circumstances, although  
327 some of its findings may be applicable to similar groups in comparable situations. [deleted for  
328 anonymization].

#### 329 Availability of data and materials

330 The data that support the findings of this study are available on request from the corresponding  
331 author. The data are not publicly available due to privacy or ethical restrictions.

#### 332 Declarations

#### 333 Acknowledgements

334 We would like to thank all participants for sharing their time and stories with us, and the local  
335 researchers who facilitated the project.

#### 336 Conflict of interest statement

337 The authors declare no competing interests.

#### 338 Funding

339 [sentence deleted for anonymization].



340 Ethics

341 The study protocol was approved by [deleted for anonymization]. Participants were informed about  
342 the study during face-to-face recruitment, and informed about the voluntary bases of participation  
343 and their right to withdraw prior or during data collection. All participants gave verbal consent for  
344 data collection and recording of interviews. Participants' anonymity was ensured by full  
345 anonymization in the analysis and discussion to remove any personal identifiable information.

346 To minimize the risk of exploitation and damaging research practices among vulnerable and  
347 marginalized community participants, we used semi-structured rather than closed questionnaires  
348 allowing participants to refocus discussions. [sentence deleted for anonymization].

349 References

350 Attride-Stirling, J. (2001). Thematic networks: An analytic tool for qualitative research. *Qualitative*

351 *Research*, 1(3), 385–405. <https://doi.org/10.1177/146879410100100307>

352 Braam, D. H., Chandio, R., Jephcott, F. L., Tasker, A., Wood, J. L. N. (2021a). Disaster displacement  
353 and zoonotic disease dynamics: The impact of structural and chronic drivers in Sindh, Pakistan. *PLOS*  
354 *Global Public Health*, 1(12): e0000068. <https://doi.org/10.1371/journal.pgph.0000068>

355 Braam, D. H., Jephcott, F. L., Wood, J. L. N. (2021b). Identifying the research gap of zoonotic disease  
356 in displacement: a systematic review. *Global Health Research and Policy*, 6, 25 (2021).  
357 <https://doi.org/10.1186/s41256-021-00205-3>

358 Ducrotoy, M. J., Majekodunmi, A. O., Shaw, A. P. M., Bagulo, H., Bertu, W. J., Gusi, A. M., ...

359 Welburn, S. C. (2018). Patterns of passage into protected areas: Drivers and outcomes of

360 Fulani immigration, settlement and integration into the Kachia Grazing Reserve, northwest

361 Nigeria. *Pastoralism*, 8(1), 1. <https://doi.org/10.1186/s13570-017-0105-1>

362 FAO. (2019). *The future of livestock in Nigeria: Opportunities and challenges in the face of*

363 *uncertainty*. Rome. Retrieved from <https://www.fao.org/3/cb1939en/CB1939EN.pdf>

364 FEWSNET. (2018). *Revised livelihoods zone map and descriptions for Nigeria*. Retrieved from

365 [https://fews.net/sites/default/files/documents/reports/Nigeria\\_LH\\_zoning\\_report\\_09\\_201](https://fews.net/sites/default/files/documents/reports/Nigeria_LH_zoning_report_09_201)

366 8.pdf

367 Higazi, A. (2016). Farmer-pastoralist conflicts on the Jos Plateau, central Nigeria: Security responses

368 of local vigilantes and the Nigerian state. *Conflict, Security & Development*, 16(4), 365–385.

369 <https://doi.org/10.1080/14678802.2016.1200314>

370 ICC. (2021). *Ending Nigeria's Herder-Farmer Crisis: The Livestock Reform Plan*. Retrieved from

371 <https://icg-prod.s3.amazonaws.com/302-ending-nigerias-herder-farmer->

372 [crisis%20%281%29.pdf](https://icg-prod.s3.amazonaws.com/302-ending-nigerias-herder-farmer-crisis%20%281%29.pdf)

373 IDMC. (2021). *Impacts of displacement: Displaced by violence, Jos, Nigeria*. Retrieved from

374 <https://www.internal->

375 displacement.org/sites/default/files/publications/documents/%202021.10.21\_IDMC\_Impact  
376 s%20of%20Displacement\_Nigeria.pdf

377 Ihekweazu, C., Michael, C. A., Nguku, P. M., Waziri, N. E., Habib, A. G., Muturi, M., ... Gloria, O.  
378 (2021). Prioritization of zoonotic diseases of public health significance in Nigeria using the  
379 one-health approach. *One Health*, 13, 100257. <https://doi.org/10.1016/j.onehlt.2021.100257>

380 IOM, ECOWAS, & ICMPD. (2017). *Regional Policies and Response to Manage Pastoral Movements*  
381 *within the ECOWAS Region*. Retrieved from  
382 [https://publications.iom.int/system/files/pdf/iom\\_ecowas\\_pastoralism.pdf](https://publications.iom.int/system/files/pdf/iom_ecowas_pastoralism.pdf)

383 Leach, M., Bett, B., Said, M., Bukachi, S., Sang, R., Anderson, N., Machila, N., Kuleszo, J., Schaten, K.,  
384 Dzingirai, V., Mangwany, L., Ntiamoa-Baidu, Y., Lawson, E., Amponsah-Mensah, K., Moses,  
385 L. M., Wilkinson, A., Grant, D. S., Koninga, J. (2017) Local disease–ecosystem–livelihood  
386 dynamics: reflections from comparative case studies in Africa. *Philosophical Transactions of*  
387 *the Royal Society B*, 372: 2016016320160163. <http://doi.org/10.1098/rstb.2016.0163>

388 Lenshie, N. E., Okengwu, K., Ogbonna, C. N., & Ezeibe, C. (2021). Desertification, migration, and  
389 herder-farmer conflicts in Nigeria: Rethinking the ungoverned spaces thesis. *Small Wars &*  
390 *Insurgencies*, 32(8), 1221–1251. <https://doi.org/10.1080/09592318.2020.1811602>

391 Majekodunmi, A. O. (2022, July 6). Nigeria’s pastoralists face a triple burden of disease outbreaks,  
392 conflict and climate change. Retrieved 26 January 2023, from LSE blog website:  
393 [https://blogs.lse.ac.uk/africaatlse/2022/07/06/nigerias-pastoralists-face-a-triple-burden-of-](https://blogs.lse.ac.uk/africaatlse/2022/07/06/nigerias-pastoralists-face-a-triple-burden-of-disease-outbreaks-conflict-and-climate-change/)  
394 [disease-outbreaks-conflict-and-climate-change/](https://blogs.lse.ac.uk/africaatlse/2022/07/06/nigerias-pastoralists-face-a-triple-burden-of-disease-outbreaks-conflict-and-climate-change/)

395 Majekodunmi, A. O., Dongkum, C., Langs, T., Shaw, A. P. M., & Welburn, S. C. (2017). Shifting  
396 livelihood strategies in northern Nigeria—Extensified production and livelihood  
397 diversification amongst Fulani pastoralists. *Pastoralism*, 7(1), 19.  
398 <https://doi.org/10.1186/s13570-017-0091-3>

399 Majekodunmi, A. O., Fajinmi, A., Dongkum, C., Shaw, A. P. M., & Welburn, S. C. (2014). Pastoral  
400 livelihoods of the Fulani on the Jos Plateau of Nigeria. *Pastoralism*, 4(1), 20.  
401 <https://doi.org/10.1186/s13570-014-0020-7>

402 Manzano, P., Burgas, D., Cadahía, L., Eronen, J. T., Fernández-Llamazares, Á., Bencherif, S., ...  
403 Stenseth, N. Chr. (2021). Toward a holistic understanding of pastoralism. *One Earth*, 4(5),  
404 651–665. <https://doi.org/10.1016/j.oneear.2021.04.012>

- 405 Ndahi, M.D., Kwaghe, A.V., Usman, J.G., Anzaku, S., Bulus, A., Angbashim, J. (2012) Detection of  
406 Transboundary Animal Diseases using Participatory Disease Surveillance in Plateau State,  
407 Nigeria. *World Rural Observations*, 4(2): 71-77. Retrived from:  
408 [https://www.sciencepub.net/rural/ruralo402/012\\_9758ruralo402\\_71\\_77.pdf](https://www.sciencepub.net/rural/ruralo402/012_9758ruralo402_71_77.pdf).
- 409 Okello, A. L., Majekodunmi, A. O., Malala, A., Welburn, S. C., & Smith, J. (2014). Identifying  
410 motivators for state-pastoralist dialogue: Exploring the relationships between livestock  
411 services, self-organisation and conflict in Nigeria’s pastoralist Fulani. *Pastoralism*, 4(1), 12.  
412 <https://doi.org/10.1186/s13570-014-0012-7>
- 413 Olaniyan, A., & Okeke-Uzodike, U. (2015). Desperate guests, unwilling hosts: Climate change-induced  
414 migration and farmer-herder conflicts in Southwestern Nigeria. *Conflict Studies Quarterly*,  
415 (10), 23–40.
- 416 Sani Ibrahim, S., Ozdeser, H., Cavusoglu, B., & Abdullahi Shagali, A. (2021). Rural Migration and  
417 Relative Deprivation in Agro-Pastoral Communities Under the Threat of Cattle Rustling in  
418 Nigeria. *SAGE Open*, 11(1), 215824402098885. <https://doi.org/10.1177/2158244020988856>
- 419 SIPRI. (2022). *Climate change and violent conflict in West Africa: Assessing the evidence*. Retrieved  
420 from [https://www.sipri.org/sites/default/files/2022-](https://www.sipri.org/sites/default/files/2022-02/sipriinsight2203_ccr_west_africa_o.pdf)  
421 [02/sipriinsight2203\\_ccr\\_west\\_africa\\_o.pdf](https://www.sipri.org/sites/default/files/2022-02/sipriinsight2203_ccr_west_africa_o.pdf)
- 422 UNOWAS. (2018). *Pastoralism and Security in West Africa and the Sahel: Towards Peaceful*  
423 *Coexistence*. Retrieved from [https://unowas.unmissions.org/pastoralism-and-security-west-](https://unowas.unmissions.org/pastoralism-and-security-west-africa-and-sahel)  
424 [africa-and-sahel](https://unowas.unmissions.org/pastoralism-and-security-west-africa-and-sahel)
- 425 Wild, H., Mendonsa, E., Trautwein, M., Edwards, J., Jowell, A., GebreGiorgis Kidanu, A., ... Barry, M.  
426 (2020). Health interventions among mobile pastoralists: A systematic review to guide health  
427 service design. *Tropical Medicine & International Health*, 25(11), 1332–1352.  
428 <https://doi.org/10.1111/tmi.13481>
- 429
- 430

431 **Figures and Tables**

432

433 *Figures 1-5 are available from the corresponding author upon request.*

434 *Figure 6: Location of fieldwork and migration routes + market locations (adapted from Open Streetmap)*

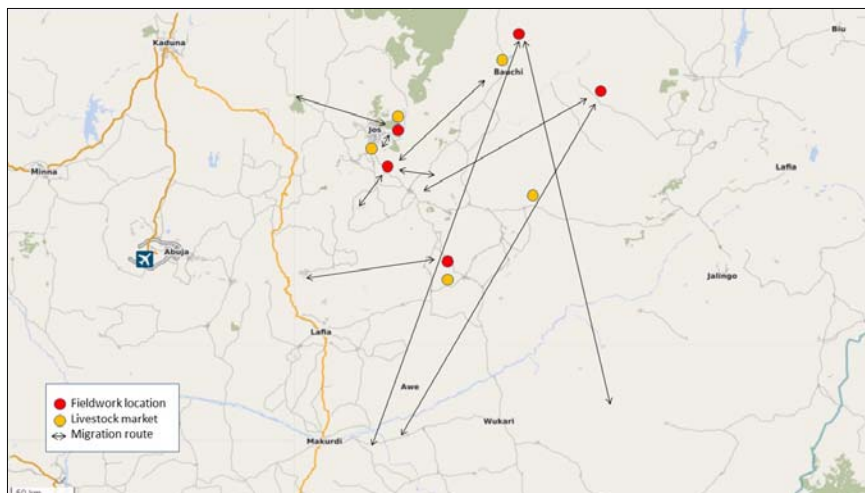

435

436

437

438 *Table 2: most reported livestock diseases per community*

| Livestock disease reported | CBPP | Fasciolosis | FMD | Anthrax | Trypanosomiasis | PPR | Foot rot | Parasites | NCD |
|----------------------------|------|-------------|-----|---------|-----------------|-----|----------|-----------|-----|
| MM1                        | X    | X           | X   |         |                 | X   | X        |           |     |
| WM1                        | X    | X           | X   | X       |                 |     |          | X         |     |
| WS2                        | X    | X           | X   |         | X               | X   |          |           | X   |
| MS2                        | X    | X           | X   |         | X               | X   | X        |           | X   |
| WK3                        | X    | X           | X   | X       |                 | X   | X        |           | X   |
| MK3                        | X    | X           | X   | X       | X               | X   | X        | X         | X   |
| WA4                        | X    | X           | X   |         | X               | X   |          | X         | X   |
| MA4                        | X    | X           | X   |         | X               | X   | X        | X         | X   |
| ML5                        | X    | X           | X   | X       | X               | X   | X        | X         |     |

439

440

441

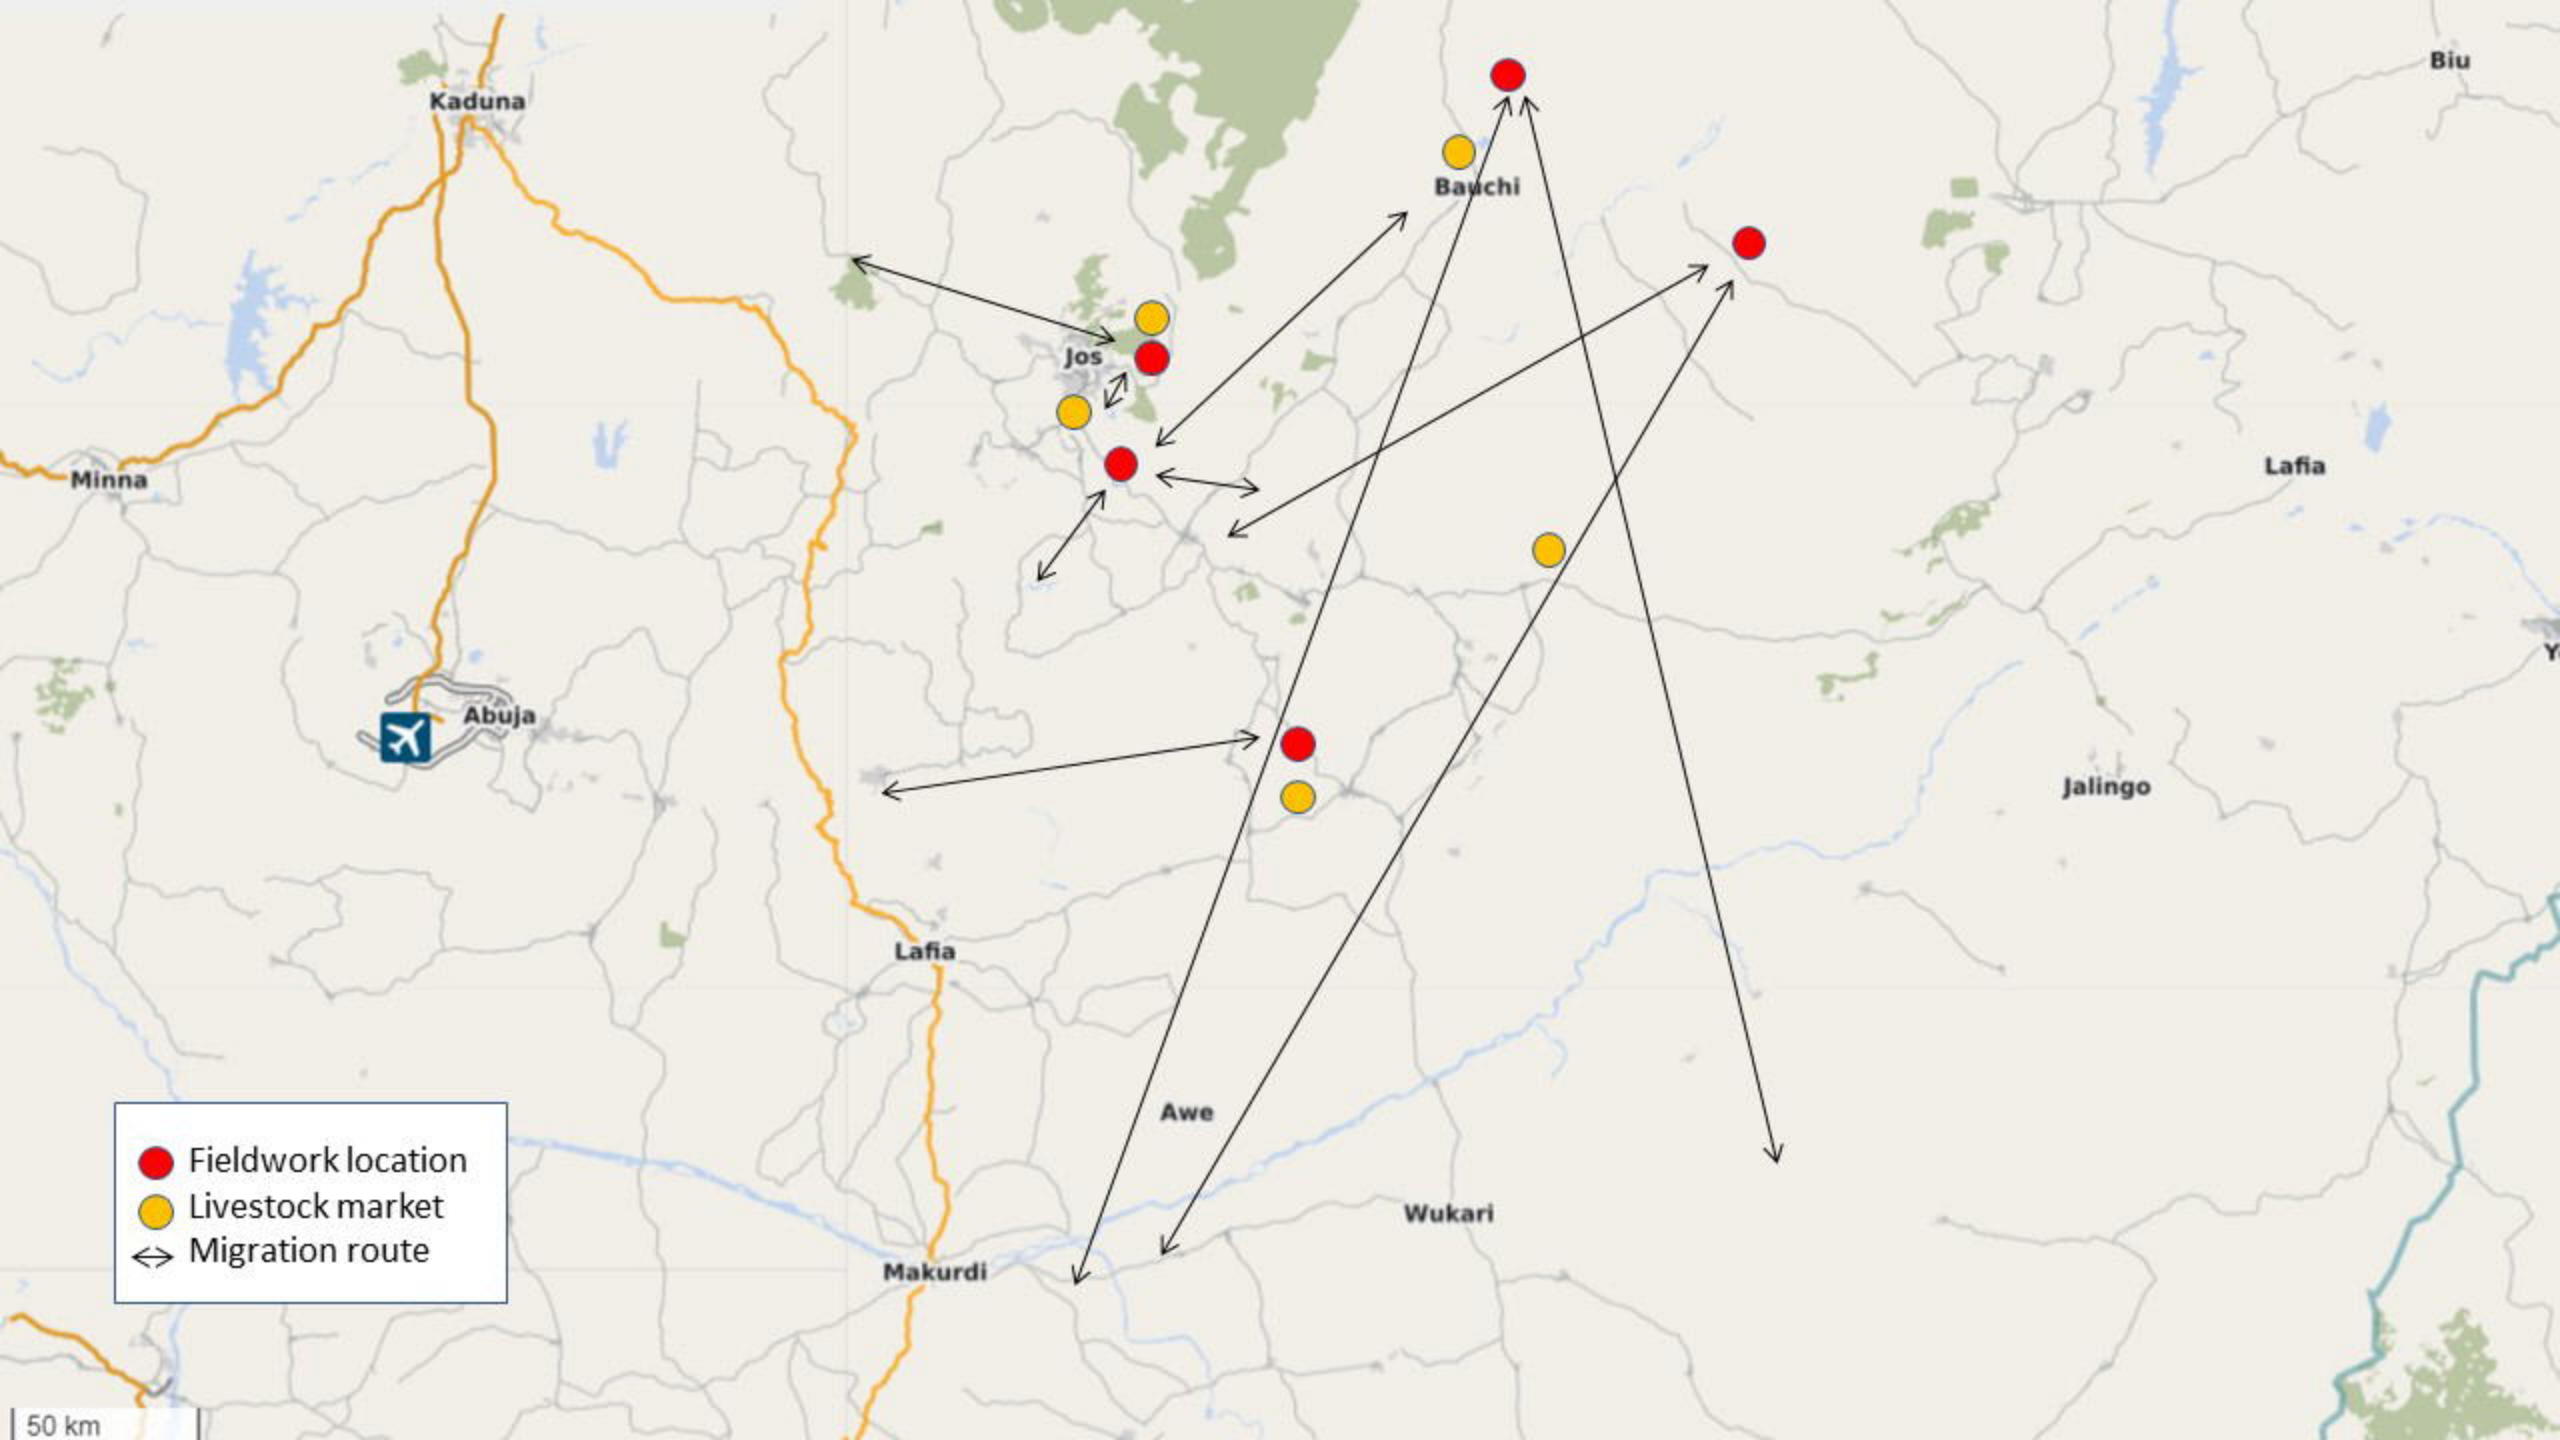

- Fieldwork location
- Livestock market
- ↔ Migration route

50 km
